# Supplementary material for: Broad Clade 2 Cross-Reactive Immunity Induced by an Adjuvanted Clade 1 rH5N1 Pandemic Influenza Vaccine
Source: PLOS journal article supplement (doi:10.1371/journal.pone.0001665), 2008-02-26
Supplement: S1 (10.1371/journal.pone.0001665.s001) [file journal.pone.0001665.s001]

CONSORT Checklist of items to include when reporting a randomized trial

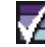

| PAPER SECTION<br>And topic                 | Item | Description                                                                                                                                                                                                                                                      | Reported on<br>Page #                                                              |
|--------------------------------------------|------|------------------------------------------------------------------------------------------------------------------------------------------------------------------------------------------------------------------------------------------------------------------|------------------------------------------------------------------------------------|
| <i>TITLE &amp; ABSTRACT</i>                | 1    | <u>How participants were allocated to interventions</u> (e.g., "random allocation", "randomized", or "randomly assigned").                                                                                                                                       | • P7<br>• Primary manuscript (Lancet: 370:580-589, 2007)                           |
| <i>INTRODUCTION</i><br>Background          | 2    | <u>Scientific background and explanation of rationale.</u>                                                                                                                                                                                                       | • P4-5: "Introduction"                                                             |
| <i>METHODS</i><br>Participants             | 3    | <u>Eligibility criteria for participants and the settings and locations where the data were collected.</u>                                                                                                                                                       | • P7<br>• P9§1<br>• Primary manuscript (Lancet: 370:580-589, 2007)                 |
| Interventions                              | 4    | <u>Precise details of the interventions intended for each group and how and when they were actually administered.</u>                                                                                                                                            | • P7 §1<br>• Primary manuscript (Lancet: 370:580-589, 2007)                        |
| Objectives                                 | 5    | <u>Specific objectives and hypotheses.</u>                                                                                                                                                                                                                       | • P8                                                                               |
| Outcomes                                   | 6    | <u>Clearly defined primary and secondary outcome measures</u> and, when applicable, any <u>methods used to enhance the quality of measurements</u> (e.g., multiple observations, training of assessors).                                                         | • P7§2<br>• P9§1, 4 last lines<br>• Primary manuscript (Lancet: 370:580-589, 2007) |
| Sample size                                | 7    | <u>How sample size was determined</u> and, when applicable, <u>explanation of any interim analyses and stopping rules.</u>                                                                                                                                       | • P9§1                                                                             |
| Randomization --<br>Sequence generation    | 8    | <u>Method used to generate the random allocation sequence, including details of any restrictions</u> (e.g., blocking, stratification)                                                                                                                            | • P7 §2<br>• Primary manuscript (Lancet: 370:580-589, 2007)                        |
| Randomization --<br>Allocation concealment | 9    | <u>Method used to implement the random allocation sequence</u> (e.g., numbered containers or central telephone), clarifying whether the sequence was concealed until interventions were assigned.                                                                | • P7 §2<br>• Primary manuscript (Lancet: 370:580-589, 2007)                        |
| Randomization --<br>Implementation         | 10   | <u>Who generated the allocation sequence, who enrolled participants, and who assigned participants to their groups.</u>                                                                                                                                          | • P7 §2<br>• Primary manuscript (Lancet: 370:580-589, 2007)                        |
| Blinding (masking)                         | 11   | <u>Whether or not participants, those administering the interventions, and those assessing the outcomes were blinded to group assignment.</u> When relevant, <u>how the success of blinding was evaluated.</u>                                                   | • P7 §2<br>• Primary manuscript (Lancet: 370:580-589, 2007)                        |
| Statistical methods                        | 12   | <u>Statistical methods used to compare groups for primary outcome(s); Methods for additional analyses,</u> such as subgroup analyses and adjusted analyses.                                                                                                      | • P7 §2<br>• P 8<br>• Primary manuscript (Lancet: 370:580-589, 2007)               |
| RESULTS<br>Participant flow                | 13   | <u>Flow of participants through each stage</u> (a diagram is strongly recommended). Specifically, for each group report the numbers of participants randomly assigned, receiving intended treatment, completing the study protocol, and analyzed for the primary | • P9 §1<br>• Primary manuscript (Lancet: 370:580-589, 2007)                        |

|                           |    |                                                                                                                                                                                                                       |                                                                           |
|---------------------------|----|-----------------------------------------------------------------------------------------------------------------------------------------------------------------------------------------------------------------------|---------------------------------------------------------------------------|
|                           |    | outcome. <u>Describe protocol deviations from study as planned, together with reasons.</u>                                                                                                                            |                                                                           |
| Recruitment               | 14 | <u>Dates defining the periods of recruitment and follow-up.</u>                                                                                                                                                       | • <b>Primary manuscript (Lancet: 370:580-589, 2007)</b>                   |
| Baseline data             | 15 | <u>Baseline demographic and clinical characteristics of each group.</u>                                                                                                                                               | • <b>P9 §1</b><br>• <b>Primary manuscript (Lancet: 370:580-589, 2007)</b> |
| Numbers analyzed          | 16 | <u>Number of participants (denominator) in each group included in each analysis and whether the analysis was by "intention-to-treat".</u> State the results in absolute numbers when feasible (e.g., 10/20, not 50%). | • <b>P9 §1</b>                                                            |
| Outcomes and estimation   | 17 | <u>For each primary and secondary outcome, a summary of results for each group, and the estimated effect size and its precision</u> (e.g., 95% confidence interval).                                                  | • <b>P 9-10</b><br>• <b>Fig 1</b><br>• <b>Fig 2</b>                       |
| Ancillary analyses        | 18 | <u>Address multiplicity by reporting any other analyses performed,</u> including subgroup analyses and adjusted analyses, indicating those pre-specified and those exploratory.                                       | • <b>P7§2</b>                                                             |
| Adverse events            | 19 | <u>All important adverse events or side effects in each intervention group.</u>                                                                                                                                       | • <b>Primary manuscript (Lancet: 370:580-589, 2007)</b>                   |
| DISCUSSION Interpretation | 20 | <u>Interpretation of the results,</u> taking into account study hypotheses, sources of potential bias or imprecision and the dangers associated with multiplicity of analyses and outcomes.                           | • <b>P 11-14</b>                                                          |
| Generalizability          | 21 | <u>Generalizability (external validity) of the trial findings.</u>                                                                                                                                                    | • <b>P 11-14</b>                                                          |
| Overall evidence          | 22 | <u>General interpretation of the results in the context of current evidence.</u>                                                                                                                                      | • <b>P 14</b>                                                             |
